# Supplementary material
Source: Springer Nature journal article supplement (https://www.springermedizin.de/resource/supplementary/12936_2011_1730_MOESM1_ESM.pdf/9541594)
Supplement: MOESM1 [file 9541594]

**Counter-clockwise  
rotation**

**Clockwise rotation**

Stage 0

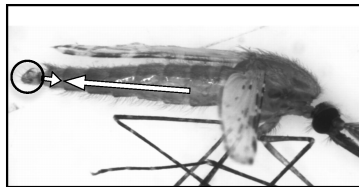

Stage 1

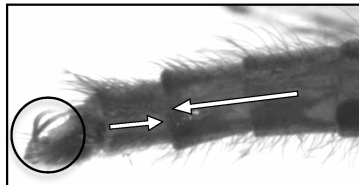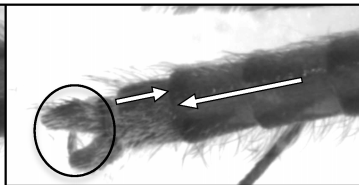

Stage 2

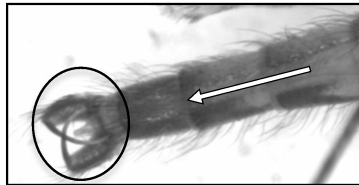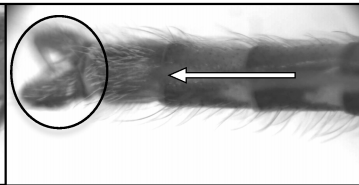

Stage 3

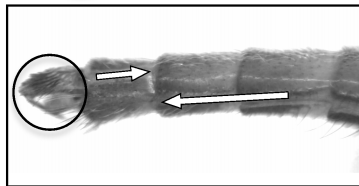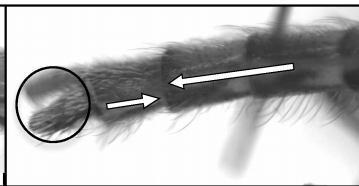

Stage 4

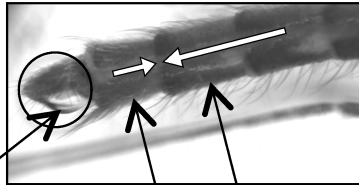

*Claspers*

*Segment 7*

*Segment 8*
